# Supplementary material for: Characterization and Analysis of Clustered Regularly Interspaced Short Palindromic Repeats (CRISPRs) in Pandemic and Non-Pandemic Vibrio parahaemolyticus Isolates from Seafood Sources
Source: MDPI journal article supplement (doi:10.3390/microorganisms9061220), 2021-06-04
Supplement: s1 [file s1]

**Table S1.** Details regarding the conserved CDSs residing in the locally collinear blocks (LCBs) obtained from ProgressiveMauve analysis.

| LCB1: Red (29 kbp)                                                                                                                                                                                                                                                                                                                                                                                                                                                                                                                                                                                                                                                                                                                                                                                                                                                                                                                                                                                                                                        | LCB2: Green lime (105 kbp)                                                                                                                                                                                                                                                                                                                                                                                                                                                                                                                                                                                                                                                                                                                                                                                                                                                                                                                                                                                                                                                                        | LCB3: Green (65 kbp)                                                                                                                                                                                                                                                                                                                                                                                                                                                                                                                                                                                                                                                                                                                                                                                                                                                                                               | LCB4: Blue (241 kbp)                                                                                                                                                                                                                                                                                                                                                                                                                                                                                                                                                                                                                                                                                                                                                                                                                                                                                                                                                                                                                                                                    | LCB5: Purple (104 kbp)                                                                                                                                                                                                                                                                                                                                                                                                                                                                                                                                                                                                                                                                                                                                                                                                                                                                                                                                                                                                                         |
|-----------------------------------------------------------------------------------------------------------------------------------------------------------------------------------------------------------------------------------------------------------------------------------------------------------------------------------------------------------------------------------------------------------------------------------------------------------------------------------------------------------------------------------------------------------------------------------------------------------------------------------------------------------------------------------------------------------------------------------------------------------------------------------------------------------------------------------------------------------------------------------------------------------------------------------------------------------------------------------------------------------------------------------------------------------|---------------------------------------------------------------------------------------------------------------------------------------------------------------------------------------------------------------------------------------------------------------------------------------------------------------------------------------------------------------------------------------------------------------------------------------------------------------------------------------------------------------------------------------------------------------------------------------------------------------------------------------------------------------------------------------------------------------------------------------------------------------------------------------------------------------------------------------------------------------------------------------------------------------------------------------------------------------------------------------------------------------------------------------------------------------------------------------------------|--------------------------------------------------------------------------------------------------------------------------------------------------------------------------------------------------------------------------------------------------------------------------------------------------------------------------------------------------------------------------------------------------------------------------------------------------------------------------------------------------------------------------------------------------------------------------------------------------------------------------------------------------------------------------------------------------------------------------------------------------------------------------------------------------------------------------------------------------------------------------------------------------------------------|-----------------------------------------------------------------------------------------------------------------------------------------------------------------------------------------------------------------------------------------------------------------------------------------------------------------------------------------------------------------------------------------------------------------------------------------------------------------------------------------------------------------------------------------------------------------------------------------------------------------------------------------------------------------------------------------------------------------------------------------------------------------------------------------------------------------------------------------------------------------------------------------------------------------------------------------------------------------------------------------------------------------------------------------------------------------------------------------|------------------------------------------------------------------------------------------------------------------------------------------------------------------------------------------------------------------------------------------------------------------------------------------------------------------------------------------------------------------------------------------------------------------------------------------------------------------------------------------------------------------------------------------------------------------------------------------------------------------------------------------------------------------------------------------------------------------------------------------------------------------------------------------------------------------------------------------------------------------------------------------------------------------------------------------------------------------------------------------------------------------------------------------------|
| <ul style="list-style-type: none"> <li>• type I restriction endonuclease subunit M CDS</li> <li>• DNA/RNA non-specific endonuclease CDS</li> <li>• DNA/RNA non-specific endonuclease CDS</li> <li>• transcriptional regulator CDS</li> <li>• H-NS histone family protein CDS</li> <li>• porin family protein CDS</li> <li>• transcriptional regulator CDS</li> <li>• H-NS histone family protein CDS</li> <li>• ANT(3'') family aminoglycoside nucleotidyltransferase CDS</li> <li>• aadA CDS</li> <li>• aadA gene</li> <li>• DUF1010 domain-containing protein CDS</li> <li>• class D beta-lactamase CDS</li> <li>• dfrA12 CDS</li> <li>• dfrA12 gene</li> <li>• chloramphenicol efflux MFS transporter CDS</li> <li>• GNAT family N-acetyltransferase CDS</li> <li>• rifampin ADP-ribosylating transferase ARR-2 CDS</li> <li>• intI1 CDS</li> <li>• intI1 gene</li> <li>• aminoglycoside nucleotidyltransferase CDS</li> <li>• transposase CDS</li> <li>• ethidium bromide resistance protein CDS</li> <li>• recombinase family protein CDS</li> </ul> | <ul style="list-style-type: none"> <li>• plasmid SOS inhibition protein A CDS</li> <li>• DUF1173 family protein CDS</li> <li>• nuclease CDS</li> <li>• DNA repair protein CDS</li> <li>• DNA-binding protein H-NS-like protein CDS</li> <li>• ISNCY-like element ISKpn21 family transposase CDS</li> <li>• ISL3-like element ISKox3 family transposase CDS</li> <li>• thioredoxin CDS</li> <li>• thiol:disulfide interchange protein CDS</li> <li>• lytic transglycosylase CDS</li> <li>• viral (Super1) RNA helicase CDS</li> <li>• MFS transporter CDS</li> <li>• efflux transporter outer membrane subunit CDS</li> <li>• multidrug efflux RND transporter permease subunit CDS</li> <li>• transcriptional regulator CDS</li> <li>• efflux RND transporter periplasmic adaptor subunit CDS</li> <li>• response regulator transcription factor CDS</li> <li>• HAMP domain-containing protein CDS</li> <li>• diguanylate cyclase CDS</li> <li>• AraC family transcriptional regulator CDS</li> <li>• EamA family transporter CDS</li> <li>• LuxR family transcriptional regulator CDS</li> </ul> | <ul style="list-style-type: none"> <li>• Helix-turn-helix domain protein CDS</li> <li>• DGQHR domain-containing protein CDS</li> <li>• phosphoadenosine phosphosulfate reductase family protein CDS</li> <li>• CobQ/CobB/MinD/ParA nucleotide binding domain protein CDS</li> <li>• ParA family protein CDS</li> <li>• HipA domain-containing protein CDS</li> <li>• uvrD1 CDS</li> <li>• uvrD1 gene</li> <li>• ATP-dependent helicase CDS</li> <li>• StbA plasmid stability protein CDS</li> <li>• ParM/StbA family protein CDS</li> <li>• DNA polymerase III subunit epsilon CDS</li> <li>• 3'-5' exonuclease CDS</li> <li>• DUF3346 domain-containing protein CDS</li> <li>• dnaG 2 CDS</li> <li>• dnaG 2 gene</li> <li>• toprim domain-containing protein CDS</li> <li>• recombination associated protein CDS</li> <li>• rdgC CDS</li> <li>• rdgC gene</li> <li>• DotI/IcmL/TraM family protein CDS</li> </ul> | <ul style="list-style-type: none"> <li>• helix-turn-helix domain-containing protein CDS</li> <li>• type II secretion system protein CDS</li> <li>• P-type DNA transfer ATPase VirB11 CDS</li> <li>• tadA CDS</li> <li>• tadA gene</li> <li>• bfpB CDS</li> <li>• bfpB gene</li> <li>• pilT CDS</li> <li>• pilT gene</li> <li>• tadA CDS</li> <li>• tadA gene</li> <li>• type IV secretory system conjugative DNA transfer family protein CDS</li> <li>• DEAD/DEAH box helicase family protein CDS</li> <li>• DNA topoisomerase III CDS</li> <li>• topA CDS</li> <li>• topA gene</li> <li>• transcriptional regulator CDS</li> <li>• diaminopimelate decarboxylase CDS</li> <li>• transcriptional regulator CDS</li> <li>• chromosome segregation protein ParM CDS</li> <li>• DNA-binding protein HU CDS</li> <li>• nuclease CDS</li> <li>• nitrite reductase CDS</li> <li>• Fe3+-siderophore ABC transporter permease CDS</li> <li>• protein-disulfide isomerase CDS</li> <li>• peptidase S49 CDS</li> <li>• phosphohydrolase CDS</li> <li>• plasmid replication protein CDS</li> </ul> | <ul style="list-style-type: none"> <li>• AAA-like domain protein CDS</li> <li>• Trypsin CDS</li> <li>• trypsin-like serine protease CDS</li> <li>• adenylosuccinate synthase CDS</li> <li>• cyclic-di-GMP phosphodiesterase CDS</li> <li>• EAL domain-containing protein CDS</li> <li>• EAL domain-containing protein CDS</li> <li>• N-6 DNA methylase CDS</li> <li>• AAA-like domain protein CDS</li> <li>• Trypsin CDS</li> <li>• EAL domain-containing protein CDS</li> <li>• prmC 2 CDS</li> <li>• prmC 2 gene</li> <li>• Y-family DNA polymerase CDS</li> <li>• XRE family transcriptional regulator CDS</li> <li>• DNA polymerase V CDS</li> <li>• hflK 5 CDS</li> <li>• hflK 5 gene</li> <li>• hflK CDS</li> <li>• hflK gene</li> <li>• hflC 3 CDS</li> <li>• hflC 3 gene</li> <li>• hflC CDS</li> <li>• hflC gene</li> <li>• restriction endonuclease CDS</li> <li>• DNA methyltransferase CDS</li> <li>• DNA cytosine methyltransferase CDS</li> <li>• HNH endonuclease CDS</li> <li>• GIY-YIG nuclease family protein CDS</li> </ul> |

|                                                                                                                                                                                                                                                                                                                                                                                                                                                                                                         |                                                                                                                                                                                                                                                                                                                                                                                                                                                                                                                                                                                                                                                                                                                                                                                                                                                                                                                                                                               |  |                                                                                                                                                                                                                                                                                                                                                                                                                                                                                                                                                                                                                                                                                                                                                                                                                                                                                                                                                                                                                                                                                                                                                                                                                                                            |                                                                                                                                                                                                                                                                                                                                                                                                                                                                                                                                                                                                                                                                                                                                                                                                                                                                                                                                                                                                                                                                                                                                                                                                                              |
|---------------------------------------------------------------------------------------------------------------------------------------------------------------------------------------------------------------------------------------------------------------------------------------------------------------------------------------------------------------------------------------------------------------------------------------------------------------------------------------------------------|-------------------------------------------------------------------------------------------------------------------------------------------------------------------------------------------------------------------------------------------------------------------------------------------------------------------------------------------------------------------------------------------------------------------------------------------------------------------------------------------------------------------------------------------------------------------------------------------------------------------------------------------------------------------------------------------------------------------------------------------------------------------------------------------------------------------------------------------------------------------------------------------------------------------------------------------------------------------------------|--|------------------------------------------------------------------------------------------------------------------------------------------------------------------------------------------------------------------------------------------------------------------------------------------------------------------------------------------------------------------------------------------------------------------------------------------------------------------------------------------------------------------------------------------------------------------------------------------------------------------------------------------------------------------------------------------------------------------------------------------------------------------------------------------------------------------------------------------------------------------------------------------------------------------------------------------------------------------------------------------------------------------------------------------------------------------------------------------------------------------------------------------------------------------------------------------------------------------------------------------------------------|------------------------------------------------------------------------------------------------------------------------------------------------------------------------------------------------------------------------------------------------------------------------------------------------------------------------------------------------------------------------------------------------------------------------------------------------------------------------------------------------------------------------------------------------------------------------------------------------------------------------------------------------------------------------------------------------------------------------------------------------------------------------------------------------------------------------------------------------------------------------------------------------------------------------------------------------------------------------------------------------------------------------------------------------------------------------------------------------------------------------------------------------------------------------------------------------------------------------------|
| <ul style="list-style-type: none"> <li>• integrase CDS</li> <li>• transcriptional regulator CDS</li> <li>• transposase CDS</li> <li>• Tn3 family transposase CDS</li> <li>• IS110-like element IS4321 family transposase CDS</li> <li>• replication initiation protein CDS</li> <li>• RNA polymerase-binding transcription factor CDS</li> <li>• transposase CDS</li> <li>• recombination regulator RecX CDS</li> <li>• RecX family transcriptional regulator CDS</li> <li>• transposase CDS</li> </ul> | <ul style="list-style-type: none"> <li>• Phage integrase family protein CDS</li> <li>• AsnC family protein CDS</li> <li>• tyrosine--tRNA ligase CDS</li> <li>• AAA family ATPase CDS</li> <li>• DNA primase CDS</li> <li>• NgrC CDS</li> <li>• integrase CDS</li> <li>• pyruvate dehydrogenase CDS</li> <li>• 5'-deoxynucleotidase CDS</li> <li>• site-specific integrase CDS</li> <li>• conjugal transfer protein TraG CDS</li> <li>• conjugal transfer protein CDS</li> <li>• thioredoxin family protein CDS</li> <li>• transposase CDS</li> <li>• conjugal transfer protein TraI CDS</li> <li>• transposase CDS</li> <li>• conjugal transfer protein TraD CDS</li> <li>• Archaeal ATPase CDS</li> <li>• AAA family ATPase CDS</li> <li>• DUF4400 domain-containing protein CDS</li> <li>• S49 family peptidase CDS</li> <li>• NERD domain-containing protein CDS</li> <li>• integrase CDS</li> <li>• Initiator Replication protein CDS</li> <li>• integrase CDS</li> </ul> |  | <ul style="list-style-type: none"> <li>• plasmid stability protein StbA CDS</li> <li>• DNA-binding protein CDS</li> <li>• regulator CDS</li> <li>• transcriptional regulator CDS</li> <li>• transglycosylase CDS</li> <li>• nucleotide excision repair protein CDS</li> <li>• permease CDS</li> <li>• conjugal transfer protein TraG CDS</li> <li>• conjugal transfer protein TraH CDS</li> <li>• conjugal transfer protein TraF CDS</li> <li>• DNA helicase CDS</li> <li>• KfrA protein CDS</li> <li>• DNA replication terminus site-binding protein CDS</li> <li>• DNA polymerase III subunit epsilon CDS</li> <li>• integrase CDS</li> <li>• topoisomerase CDS</li> <li>• VWA domain-containing protein CDS</li> <li>• cell surface protein CDS</li> <li>• DUF3150 domain-containing protein CDS</li> <li>• ATP-binding protein CDS</li> <li>• ATP-dependent helicase CDS</li> <li>• type II toxin-antitoxin system Phd/YefM family antitoxin CDS</li> <li>• type II toxin-antitoxin system RelE/ParE family toxin CDS</li> <li>• IS200/IS605 family transposase CDS</li> <li>• transposase CDS</li> <li>• transposase CDS</li> <li>• tnpA CDS</li> <li>• tnpA gene</li> <li>• transposase CDS</li> <li>• conjugal transfer protein TraG CDS</li> </ul> | <ul style="list-style-type: none"> <li>• Phage integrase family protein CDS</li> <li>• DUF2971 domain-containing protein CDS</li> <li>• DUF4365 domain-containing protein CDS</li> <li>• ProQ/FINO family protein CDS</li> <li>• IS4-like element ISEc29 family transposase CDS</li> <li>• ArmA family 16S rRNA (guanine(1405)-N(7))-methyltransferase CDS</li> <li>• IS5 family transposase CDS</li> <li>• IS91 family transposase CDS</li> <li>• transposase CDS</li> <li>• xerC CDS</li> <li>• xerC gene</li> <li>• site-specific integrase CDS</li> <li>• ATP:cob(I)alamin adenosyltransferase CDS</li> <li>• EAL domain-containing protein CDS</li> <li>• bifunctional diguanylate cyclase/phosphodiesterase CDS</li> <li>• Phage integrase family protein CDS</li> <li>• tyrosine-type recombinase/integrase CDS</li> <li>• sul1 CDS</li> <li>• sul1 gene</li> <li>• sulfonamide-resistant dihydropteroate synthase Sul1 CDS</li> <li>• DNA methyltransferase CDS</li> <li>• DNA cytosine methyltransferase CDS</li> <li>• quaternary ammonium compound efflux SMR transporter QacE delta 1 CDS</li> <li>• ethidium bromide resistance protein CDS</li> <li>• type I restriction endonuclease subunit M CDS</li> </ul> |
|---------------------------------------------------------------------------------------------------------------------------------------------------------------------------------------------------------------------------------------------------------------------------------------------------------------------------------------------------------------------------------------------------------------------------------------------------------------------------------------------------------|-------------------------------------------------------------------------------------------------------------------------------------------------------------------------------------------------------------------------------------------------------------------------------------------------------------------------------------------------------------------------------------------------------------------------------------------------------------------------------------------------------------------------------------------------------------------------------------------------------------------------------------------------------------------------------------------------------------------------------------------------------------------------------------------------------------------------------------------------------------------------------------------------------------------------------------------------------------------------------|--|------------------------------------------------------------------------------------------------------------------------------------------------------------------------------------------------------------------------------------------------------------------------------------------------------------------------------------------------------------------------------------------------------------------------------------------------------------------------------------------------------------------------------------------------------------------------------------------------------------------------------------------------------------------------------------------------------------------------------------------------------------------------------------------------------------------------------------------------------------------------------------------------------------------------------------------------------------------------------------------------------------------------------------------------------------------------------------------------------------------------------------------------------------------------------------------------------------------------------------------------------------|------------------------------------------------------------------------------------------------------------------------------------------------------------------------------------------------------------------------------------------------------------------------------------------------------------------------------------------------------------------------------------------------------------------------------------------------------------------------------------------------------------------------------------------------------------------------------------------------------------------------------------------------------------------------------------------------------------------------------------------------------------------------------------------------------------------------------------------------------------------------------------------------------------------------------------------------------------------------------------------------------------------------------------------------------------------------------------------------------------------------------------------------------------------------------------------------------------------------------|

|  |  |  |                                                                                                                                                                                                                                                                                                                                                                                                                                                                                                                                                                                                                                                                                                                                                                                                                                                                                                                                                                                                                                                                                                                                                                                           |  |
|--|--|--|-------------------------------------------------------------------------------------------------------------------------------------------------------------------------------------------------------------------------------------------------------------------------------------------------------------------------------------------------------------------------------------------------------------------------------------------------------------------------------------------------------------------------------------------------------------------------------------------------------------------------------------------------------------------------------------------------------------------------------------------------------------------------------------------------------------------------------------------------------------------------------------------------------------------------------------------------------------------------------------------------------------------------------------------------------------------------------------------------------------------------------------------------------------------------------------------|--|
|  |  |  | <ul style="list-style-type: none"> <li>• conjugal transfer protein TraN CDS</li> <li>• plasmid transfer protein CDS</li> <li>• conjugal transfer protein CDS</li> <li>• lepB CDS</li> <li>• lepB gene</li> <li>• TraM recognition domain-containing protein CDS</li> <li>• plasmid transfer protein CDS</li> <li>• DotA/TraY family protein CDS</li> <li>• HtdA CDS</li> <li>• TrhO CDS</li> <li>• trhZ CDS</li> <li>• DNA primase CDS</li> <li>• AAA family ATPase CDS</li> <li>• traV CDS</li> <li>• traV gene</li> <li>• DsbC family protein CDS</li> <li>• conjugal transfer protein TraB CDS</li> <li>• DNA (cytosine-5-)-methyltransferase CDS</li> <li>• DNA cytosine methyltransferase CDS</li> <li>• traK family protein CDS</li> <li>• conjugal transfer protein TraE CDS</li> <li>• plasmid transfer protein CDS</li> <li>• pili assembly chaperone CDS</li> <li>• IS5-like element ISKpn26 family transposase CDS</li> <li>• DNA-binding protein CDS</li> <li>• DUF4165 domain-containing protein CDS</li> <li>• ParA family protein CDS</li> <li>• peptide transporter CDS</li> <li>• DUF4165 domain-containing protein CDS</li> <li>• IS3 family transposase CDS</li> </ul> |  |
|--|--|--|-------------------------------------------------------------------------------------------------------------------------------------------------------------------------------------------------------------------------------------------------------------------------------------------------------------------------------------------------------------------------------------------------------------------------------------------------------------------------------------------------------------------------------------------------------------------------------------------------------------------------------------------------------------------------------------------------------------------------------------------------------------------------------------------------------------------------------------------------------------------------------------------------------------------------------------------------------------------------------------------------------------------------------------------------------------------------------------------------------------------------------------------------------------------------------------------|--|

|  |  |  |                                                                                                                                                                                                                                                                                                                                                                                                                                                                                                                                                                                                                                                                                                                                                                                                                                                                                                                                                                                                                                                                                                                                                                    |  |
|--|--|--|--------------------------------------------------------------------------------------------------------------------------------------------------------------------------------------------------------------------------------------------------------------------------------------------------------------------------------------------------------------------------------------------------------------------------------------------------------------------------------------------------------------------------------------------------------------------------------------------------------------------------------------------------------------------------------------------------------------------------------------------------------------------------------------------------------------------------------------------------------------------------------------------------------------------------------------------------------------------------------------------------------------------------------------------------------------------------------------------------------------------------------------------------------------------|--|
|  |  |  | <ul style="list-style-type: none"> <li>• DUF4165 domain-containing protein CDS</li> <li>• DUF4165 domain-containing protein CDS</li> <li>• NYN domain-containing protein CDS</li> <li>• HNH endonuclease CDS</li> <li>• DNA-binding protein CDS</li> <li>• dnaC CDS</li> <li>• dnaC gene</li> <li>• DNA cytosine methyltransferase CDS</li> <li>• restriction endonuclease CDS</li> <li>• DUF3846 domain-containing protein CDS</li> <li>• conjugal transfer protein TraF CDS</li> <li>• Eac protein CDS</li> <li>• 2Fe-2S ferredoxin-like protein CDS</li> <li>• plasmid maintenance system killer family protein CDS</li> <li>• IS6-like element IS26 family transposase CDS</li> <li>• IS6-like element IS26 family transposase CDS</li> <li>• Tn3 family transposase CDS</li> <li>• cupin fold metalloprotein, WbuC family CDS</li> <li>• type II toxin-antitoxin system PemK/MazF family toxin CDS</li> <li>• AbrB/MazE/SpoVT family DNA-binding domain-containing protein CDS</li> <li>• class A extended-spectrum beta-lactamase CTX-M-15 CDS</li> <li>• site-specific integrase CDS</li> <li>• IS1380-like element ISEc9 family transposase CDS</li> </ul> |  |
|--|--|--|--------------------------------------------------------------------------------------------------------------------------------------------------------------------------------------------------------------------------------------------------------------------------------------------------------------------------------------------------------------------------------------------------------------------------------------------------------------------------------------------------------------------------------------------------------------------------------------------------------------------------------------------------------------------------------------------------------------------------------------------------------------------------------------------------------------------------------------------------------------------------------------------------------------------------------------------------------------------------------------------------------------------------------------------------------------------------------------------------------------------------------------------------------------------|--|

|  |  |  |                                                                                                                                                                                                                                                                                                                                                                                                                                                                                                                                                                                                                                                                                                                                                                                                                                                                                                                                                                                                                                                                                          |  |
|--|--|--|------------------------------------------------------------------------------------------------------------------------------------------------------------------------------------------------------------------------------------------------------------------------------------------------------------------------------------------------------------------------------------------------------------------------------------------------------------------------------------------------------------------------------------------------------------------------------------------------------------------------------------------------------------------------------------------------------------------------------------------------------------------------------------------------------------------------------------------------------------------------------------------------------------------------------------------------------------------------------------------------------------------------------------------------------------------------------------------|--|
|  |  |  | <ul style="list-style-type: none"> <li>• DUF4158 domain-containing protein CDS</li> <li>• recombinase family protein CDS</li> <li>• DUF4942 domain-containing protein CDS</li> <li>• type IV secretion protein Rhs CDS</li> <li>• class A broad-spectrum beta-lactamase TEM-1 CDS</li> <li>• IS91 family transposase CDS</li> <li>• aminoglycoside O-phosphotransferase APH(6)-Id CDS</li> <li>• aph(3'') CDS</li> <li>• aph(3'') gene</li> <li>• relE CDS</li> <li>• relE gene</li> <li>• type II toxin-antitoxin system RelE/ParE family toxin CDS</li> <li>• yafN CDS</li> <li>• yafN gene</li> <li>• type II toxin-antitoxin system Phd/YefM family antitoxin CDS</li> <li>• sul2 CDS</li> <li>• sul2 gene</li> <li>• transcriptional regulator CDS</li> <li>• DUF4102 domain-containing protein CDS</li> <li>• IS110-like element IS5075 family transposase CDS</li> <li>• transposase CDS</li> <li>• Tn3 family transposase CDS</li> <li>• AraC family transcriptional regulator CDS</li> <li>• IS6-like element IS26 family transposase CDS</li> <li>• transposase CDS</li> </ul> |  |
|--|--|--|------------------------------------------------------------------------------------------------------------------------------------------------------------------------------------------------------------------------------------------------------------------------------------------------------------------------------------------------------------------------------------------------------------------------------------------------------------------------------------------------------------------------------------------------------------------------------------------------------------------------------------------------------------------------------------------------------------------------------------------------------------------------------------------------------------------------------------------------------------------------------------------------------------------------------------------------------------------------------------------------------------------------------------------------------------------------------------------|--|
