# Supplementary material for: Characterization and Analysis of Clustered Regularly Interspaced Short Palindromic Repeats (CRISPRs) in Pandemic and Non-Pandemic Vibrio parahaemolyticus Isolates from Seafood Sources
Source: MDPI journal article supplement (doi:10.3390/microorganisms9061220), 2021-06-04
Supplement: s1 [file s1]

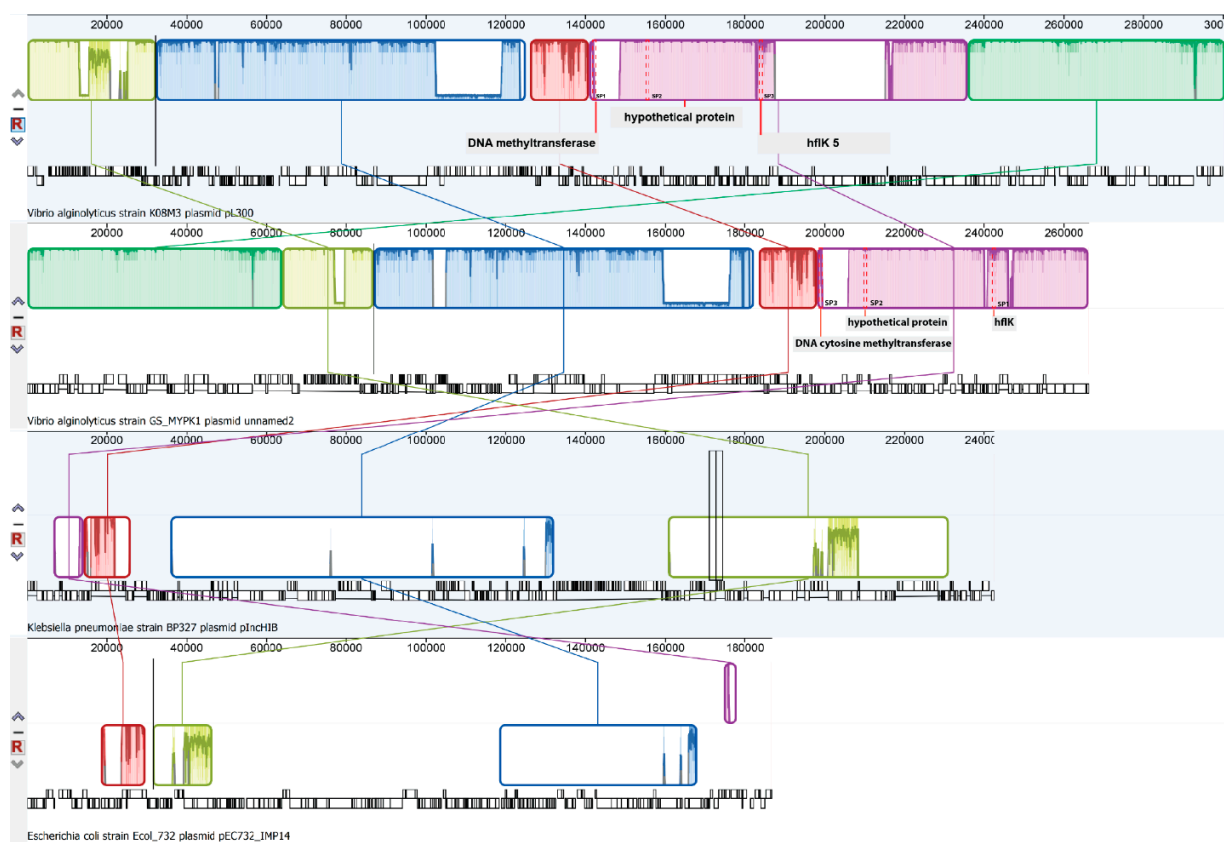

**Figure S1.** The multiple genome alignment by the progressiveMauve between *V. alginolyticus* pL300 megaplasmid (top) and other plasmids from the blast hit results. Homologous genomes are indicated by the connected-with-lines collinear blocks.
